# Supplementary material
Source: Springer Nature journal article supplement (https://www.springermedizin.de/resource/supplementary/12885_2011_3020_MOESM8_ESM.pdf/9462640)
Supplement: MOESM8 [file 9462640]

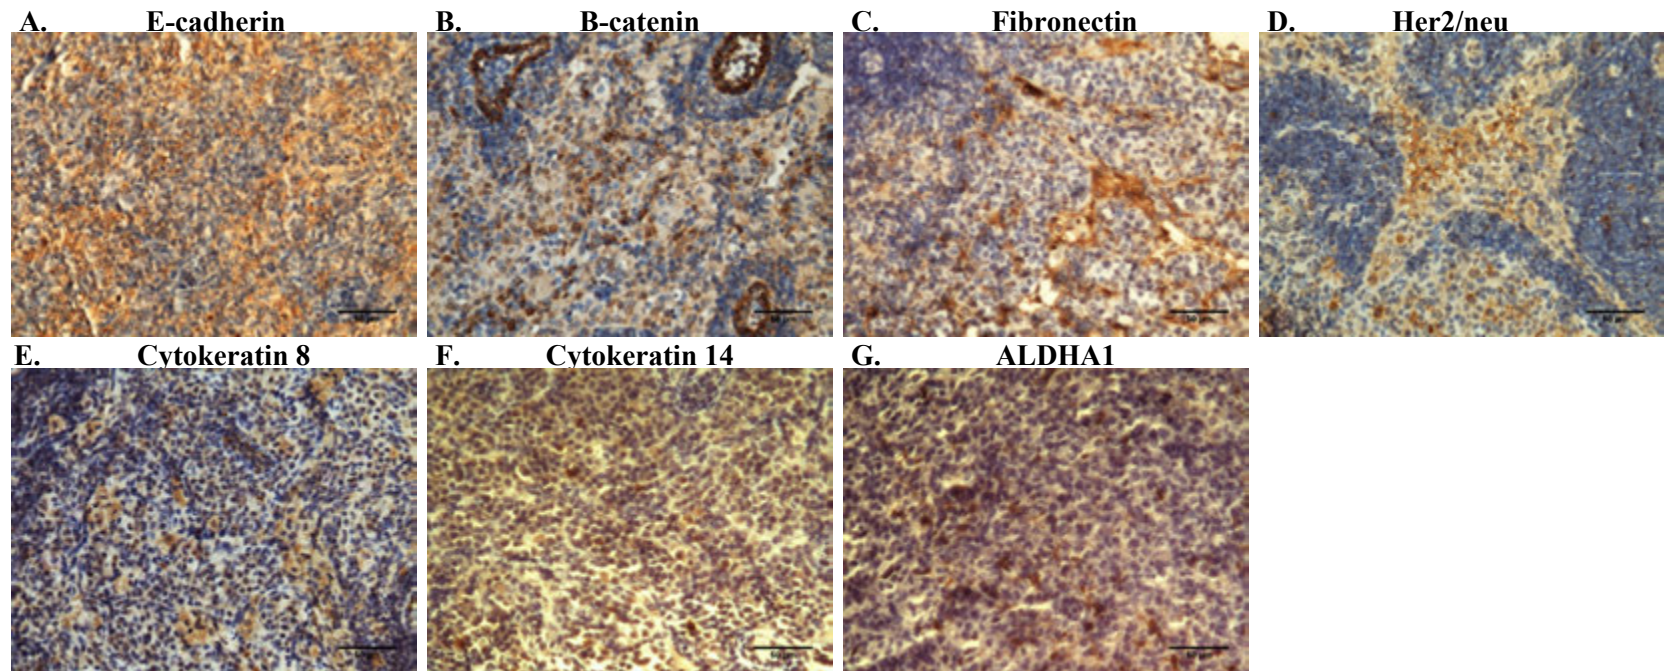

**H.**

| SAMPLE | E-cadherin       | $\beta$ -catenin | Fibronectin       | Her2/neu         | Cytokeratin 8    | Cytokeratin 14   | ALDH1A1          |
|--------|------------------|------------------|-------------------|------------------|------------------|------------------|------------------|
| 5      | 38.4% $\pm$ 15.6 | 58.4% $\pm$ 12.3 | 42.2% $\pm$ 6.50  | 58.1% $\pm$ 13.2 | 65.4% $\pm$ 12.3 | 42.4% $\pm$ 10.8 | 13.6% $\pm$ 4.67 |
| 6      | 59.7% $\pm$ 18.9 | 66.0% $\pm$ 13.2 | 58.6% $\pm$ 12.37 | 39.4% $\pm$ 16.0 | 29.7% $\pm$ 4.9  | Negative         | 13.1% $\pm$ 6.95 |
| 7      | 69.5% $\pm$ 8.3  | 76.4% $\pm$ 4.2  | 71.1% $\pm$ 17.1  | 28.0% $\pm$ 11.2 | 40.5% $\pm$ 6.5  | Negative         | 15.0% $\pm$ 6.1  |
| 8      | 80.5% $\pm$ 5.7  | 61.3% $\pm$ 12.8 | 78.8% $\pm$ 7.8   | 72.3% $\pm$ 6.0  | 66.7% $\pm$ 10.8 | Negative         | Negative         |
| 9      | 53.9% $\pm$ 7.7  | 52.3% $\pm$ 9.4  | 61.3% $\pm$ 9.6   | 45.9% $\pm$ 16.1 | 49.1% $\pm$ 13.3 | 19.6% $\pm$ 10.4 | 19.1 $\pm$ 8.3   |

**I.**

| SAMPLE | Histoscore (Her2 staining) |
|--------|----------------------------|
| 5      | 6.3 $\pm$ 0.6              |
| 6      | 4.3 $\pm$ 0.6              |
| 7      | 2.7 $\pm$ 0.6              |
| 8      | 5.7 $\pm$ 0.6              |
| 9      | 4 $\pm$ 1                  |
